# Supplementary material for: Molecular Detection and Characterization of Borrelia garinii (Spirochaetales: Borreliaceae) in Ixodes nipponensis (Ixodida: Ixodidae) Parasitizing a Dog in Korea
Source: MDPI journal article supplement (doi:10.3390/pathogens8040289), 2019-12-06
Supplement: s1 [file s1]

Table S1. Mitochondrial 16S rRNA sequences from ticks included in the phylogenetic analysis summarized according to species, strain or isolate, length (bp), and GenBank accession number.

|    | Species                          | Strain or isolate | length (bp) | GenBank accession no. |
|----|----------------------------------|-------------------|-------------|-----------------------|
| 1  | <i>Ixodes nipponensis</i>        | DT-42             | 343         | MH717250              |
| 2  | <i>Ixodes nipponensis</i>        | chungzyuAF5       | 454         | AB006028              |
| 3  | <i>Ixodes nipponensis</i>        | saitamaAM1        | 456         | AB006020              |
| 4  | <i>Ixodes asanumai</i>           | Ias-E             | 412         | AB819230              |
| 5  | <i>Ixodes persulcatus</i>        | N/A               | 457         | L34295                |
| 6  | <i>Ixodes scapularis</i>         | North Carolina    | 456         | L43863                |
| 7  | <i>Ixodes pacificus</i>          | N/A               | 459         | L64296                |
| 8  | <i>Ixodes uriae</i>              | faeroe-2          | 457         | AB030017              |
| 9  | <i>Ixodes holocyclus</i>         | no4               | 464         | AB051845              |
| 10 | <i>Haemaphysalis longicornis</i> | YN07              | 455         | JX051064              |
| 11 | <i>Dermacentor marginatus</i>    | XJ056             | 451         | JX051094              |
| 12 | <i>Rhipicephalus sanguineus</i>  | HB193             | 430         | KC203362              |
| 13 | <i>Rhipicephalus microplus</i>   | T44               | 427         | KP210071              |
| 14 | <i>Hyalomma asiaticum</i>        | IM035             | 445         | JX051075              |
| 15 | <i>Hyalomma detritum</i>         | XJ150             | 447         | KC203349              |
| 16 | <i>Ornithodoros rietcorrei</i>   | N/A               | 427         | KX130782              |

Table S2. The second intergenic spacer region sequences from ticks included in the phylogenetic analysis summarized according to species, strain or isolate, length (bp), and GenBank accession number.

|    | Species                          | Strain or isolate | length (bp) | GenBank accession no. |
|----|----------------------------------|-------------------|-------------|-----------------------|
| 1  | <i>Ixodes nipponensis</i>        | DT-42             | 769         | MH714720              |
| 2  | <i>Ixodes nipponensis</i>        | inipp6            | 830         | D88851                |
| 3  | <i>Ixodes nipponensis</i>        | inipp2            | 830         | D88847                |
| 4  | <i>Ixodes persulcatus</i>        | ipn4              | 824         | D88873                |
| 5  | <i>Ixodes pacificus</i>          | California        | 1247        | L22277                |
| 6  | <i>Ixodes scapularis</i>         | Georgia           | 1208        | L22273                |
| 7  | <i>Ixodes asanumai</i>           | iasan1            | 817         | D88835                |
| 8  | <i>Haemaphysalis longicornis</i> | YN07              | 1592        | KC203395              |
| 9  | <i>Rhipicephalus sanguineus</i>  | HB193             | 1084        | KC203363              |
| 10 | <i>Rhipicephalus microplus</i>   | YN010             | 1098        | KC203366              |
| 11 | <i>Hyalomma asiaticum</i>        | IM035             | 1418        | KC203372              |
| 12 | <i>Hyalomma detritum</i>         | XJ143             | 1369        | KC203393              |
| 13 | <i>Dermacentor marginatus</i>    | XJ056             | 1063        | KC203415              |
| 14 | <i>Dermacentor nuttalli</i>      | XJ061             | 1059        | KC203418              |
| 15 | <i>Ixodes uriae</i>              | N1                | 905         | D88297                |
| 16 | <i>Ixodes holocyclus</i>         | 4U                | 793         | AB025591              |
| 17 | <i>Ornithodoros rietcorreai</i>  | N/A               | 434         | KX130796              |

Table S3. The 5S-23S intergenic spacer region of *Borrelia* species included in the phylogenetic analysis summarized according to species, strain or isolate, length (bp), and GenBank accession number.

|    | Species               | Strain or isolate | Host                      | Country     | length (bp) | GenBank accession no. |
|----|-----------------------|-------------------|---------------------------|-------------|-------------|-----------------------|
| 1  | <i>B. garinii</i>     | DT-42             | <i>Ixodes nipponensis</i> | Korea       | 255         | KU848760              |
| 2  | <i>B. afzelii</i>     | J1                | <i>Ixodes persulcatus</i> | Japan       | 246         | L30129                |
| 3  | <i>B. afzelii</i>     | VS461             | <i>Ixodes ricinus</i>     | Switzerland | 246         | L30135                |
| 4  | <i>B. bavariensis</i> | Ptrob             | Human                     | Slovenia    | 163         | FJ546496              |
| 5  | <i>B. burgdorferi</i> | IP1               | <i>Ixodes dentatus</i>    | USA         | 238         | AF090977              |
| 6  | <i>B. burgdorferi</i> | B31               | <i>Ixodes scapularis</i>  | USA         | 254         | L30127                |
| 7  | <i>B. burgdorferi</i> | IPT23             | <i>Ixodes ricinus</i>     | France      | 164         | FJ546534              |
| 8  | <i>B. garinii</i>     | 935T              | <i>Ixodes persulcatus</i> | Korea       | 237         | AB013916              |
| 9  | <i>B. garinii</i>     | CT7p              | <i>Ixodes persulcatus</i> | China       | 253         | AB035963              |
| 10 | <i>B. garinii</i>     | Sapporo dog-1     | Dog                       | Japan       | 199         | AB775651              |
| 11 | <i>B. garinii</i>     | Bg-PP-TW1         | human skin                | Taiwan      | 221         | JX649205              |
| 12 | <i>B. garinii</i>     | 20047             | <i>Ixodes ricinus</i>     | France      | 253         | L30119                |
| 13 | <i>B. garinii</i>     | NT29              | <i>Ixodes persulcatus</i> | Japan       | 253         | L30130                |
| 14 | <i>B. garinii</i>     | Pbi               | Human                     | Germany     | 163         | FJ546494              |
| 15 | <i>B. garinii</i>     | VH4               | N/A                       | China       | 255         | DQ150544              |
| 16 | <i>B. garinii</i>     | Tr77              | <i>Ixodes ricinus</i>     | Turkey      | 253         | AB091797              |
| 17 | <i>B. garinii</i>     | IPT165            | <i>Ixodes ricinus</i>     | France      | 163         | FJ546507              |
| 18 | <i>B. garinii</i>     | IPT178            | <i>Ixodes ricinus</i>     | France      | 163         | FJ546513              |
| 19 | <i>B. japonica</i>    | Cow611C           | <i>Ixodes ovatus</i>      | Japan       | 236         | L30125                |
| 20 | <i>B. japonica</i>    | HO14              | <i>Ixodes ovatus</i>      | Japan       | 236         | L30128                |
| 21 | <i>B. sinica</i>      | CWO1              | <i>Ixodes ovatus</i>      | China       | 236         | AB022130              |
| 22 | <i>B. sinica</i>      | NNIo              | <i>Ixodes ovatus</i>      | Nepal       | 238         | AB100435              |
| 23 | <i>B. valaisiana</i>  | CKA2a             | <i>Apodemus agrarius</i>  | China       | 254         | AB022124              |

|    |                      |       |                       |             |     |        |
|----|----------------------|-------|-----------------------|-------------|-----|--------|
| 24 | <i>B. valaisiana</i> | VS116 | <i>Ixodes ricinus</i> | Switzerland | 255 | L30134 |
|----|----------------------|-------|-----------------------|-------------|-----|--------|

---

Table S4. *Flagellin* gene of *Borrelia* species included in the phylogenetic analysis summarized according to species, strain or isolate, length (bp), and GenBank accession number.

|    | Species                  | Strain or isolate | Host                          | Country        | length (bp) | GenBank accession no. |
|----|--------------------------|-------------------|-------------------------------|----------------|-------------|-----------------------|
| 1  | <i>B. garinii</i>        | DT-42             | <i>Ixodes nipponensis</i>     | Korea          | 354         | MH716232              |
| 2  | <i>B. afzelii</i>        | BO23              | Human                         | Sweden         | 456         | DQ111033              |
| 3  | <i>B. afzelii</i>        | B72-EA            | <i>Meles meles</i>            | Poland         | 789         | KF422785              |
| 4  | <i>B. americana</i>      | SCW-33            | <i>Ixodes minor</i>           | USA            | 497         | EU081293              |
| 5  | <i>B. americana</i>      | SCW-42c           | <i>Ixodes minor</i>           | USA            | 497         | EU081295              |
| 6  | <i>B. bissettii</i>      | CA128             | <i>Ixodes pacificus</i>       | USA            | 456         | DQ393343              |
| 7  | <i>B. burgdorferi</i>    | Z51094            | <i>Ixodes ricinus</i>         | Germany        | 459         | DQ393336              |
| 8  | <i>B. burgdorferi</i>    | Z41493            | <i>Ixodes ricinus</i>         | Germany        | 456         | DQ393337              |
| 9  | <i>B. californiensis</i> | CA446             | <i>Dipodomys californicus</i> | USA            | 456         | DQ393347              |
| 10 | <i>B. carolinensis</i>   | SCW-22            | <i>Ixodes minor</i>           | USA            | 497         | EU076496              |
| 11 | <i>B. garinii</i>        | 935T              | <i>Ixodes nipponensis</i>     | Korea          | 952         | AB017479              |
| 12 | <i>B. garinii</i>        | Pbi               | Human                         | Germany        | 600         | AB035595              |
| 13 | <i>B. garinii</i>        | PD89              | Human                         | China          | 584         | AY342022              |
| 14 | <i>B. garinii</i>        | G2                | Human                         | Germany        | 584         | AY342024              |
| 15 | <i>B. garinii</i>        | SIKA1             | <i>Ixodes ovatus</i>          | Japan          | 584         | AY342025              |
| 16 | <i>B. garinii</i>        | IP89              | <i>Ixodes persulcatus</i>     | Russia         | 584         | AY342027              |
| 17 | <i>B. garinii</i>        | NT29              | <i>Ixodes persulcatus</i>     | Japan          | 456         | DQ111032              |
| 18 | <i>B. garinii</i>        | p1A8              | Human                         | Czech Republic | 495         | FJ231330              |
| 19 | <i>B. garinii</i>        | 234               | Human                         | China          | 579         | JX888450              |
| 20 | <i>B. garinii</i>        | 60-S-12           | <i>Apodemus agrarius</i>      | Poland         | 587         | KF894054              |
| 21 | <i>B. garinii</i>        | lp90              | <i>Ixodes persulcatus</i>     | Russia         | 1011        | L42885                |
| 22 | <i>B. garinii</i>        | Lug4N             | <i>Ixodes ricinus</i>         | Spain          | 359         | MG245785              |
| 23 | <i>B. hermsii</i>        | HS1               | <i>Ornithodoros hermsi</i>    | USA            | 1736        | M86838                |
| 24 | <i>B. japonica</i>       | H014              | <i>Ixodes ovatus</i>          | Japan          | 987         | D82852                |

|    |                      |         |                                  |          |     |          |
|----|----------------------|---------|----------------------------------|----------|-----|----------|
| 25 | <i>B. japonica</i>   | NT112   | <i>Ixodes ovatus</i>             | Japan    | 987 | D82853   |
| 26 | <i>B. lusitaniae</i> | PotiB1  | <i>Ixodes ricinus</i>            | Portugal | 456 | DQ111035 |
| 27 | <i>B. turdi</i>      | Yh501   | <i>Ixodes turdus</i>             | Japan    | 876 | D85071   |
| 28 | <i>B. valaisiana</i> | OM95/01 | <i>Mus caroli</i>                | Japan    | 600 | AB091706 |
| 29 | <i>B. valaisiana</i> | QSYSP4  | <i>Haemaphysalis longicornis</i> | China    | 913 | EU135604 |
| 30 | <i>Borrelia</i> sp.  | B       | <i>Ixodes pararicinus</i>        | Uruguay  | 459 | JX082312 |
| 31 | <i>Borrelia</i> sp.  | Pampa   | <i>Ixodes longiscutatus</i>      | Brazil   | 318 | KY657353 |

---

Table S5. *Outer surface protein A* gene of *Borrelia* species included in the phylogenetic analysis summarized according to species, strain or isolate, length (bp), and GenBank accession number.

|    | Species               | Strain or isolate | Host                        | Country        | length (bp) | GenBank accession no. |
|----|-----------------------|-------------------|-----------------------------|----------------|-------------|-----------------------|
| 1  | <i>B. garinii</i>     | DT-42             | <i>Ixodes nipponensis</i>   | Korea          | 313         | KU848761              |
| 2  | <i>B. afzelii</i>     | WDT-43            | Water deer tick             | Korea          | 310         | KU848759              |
| 3  | <i>B. afzelii</i>     | 214               | <i>Ixodes ricinus</i>       | Luxembourg     | 779         | GU826938              |
| 4  | <i>B. bavariensis</i> | 2_10A_263         | <i>Aedes vexans</i>         | Germany        | 225         | ln650625              |
| 5  | <i>B. bavariensis</i> | lp54              | Tick                        | Slovakia       | 700         | JX274591              |
| 6  | <i>B. bavariensis</i> | Ptrob             | Human                       | Germany        | 282         | GQ178234              |
| 7  | <i>B. bavariensis</i> | CSF1411           | Human                       | Czech Republic | 302         | KT934525              |
| 8  | <i>B. bavariensis</i> | CSF1851           | Human                       | Czech Republic | 305         | KT934526              |
| 9  | <i>B. burgorferi</i>  | 297               | Human                       | USA            | 822         | X85442                |
| 10 | <i>B. burgorferi</i>  | IPT23             | <i>Ixodes ricinus</i>       | France         | 282         | FJ546645              |
| 11 | <i>B. garinii</i>     | IO-TP-TW          | <i>Ixodes ovatus</i> on Cat | Taiwan         | 315         | KM397123              |
| 12 | <i>B. garinii</i>     | Strain: Pbi       | Human                       | Germany        | 822         | X80257                |
| 13 | <i>B. garinii</i>     | Mng 1602          | <i>Ixodes persulcatus</i>   | Mongolia       | 822         | DQ479282              |
| 14 | <i>B. garinii</i>     | T-MDJ             | <i>Dermacentor</i> sp.      | China          | 802         | HM007278              |
| 15 | <i>B. garinii</i>     | 39022             | <i>Ixodes persulcatus</i>   | Russia         | 819         | EU635991              |
| 16 | <i>B. garinii</i>     | Tom 7105          | <i>Ixodes persulcatus</i>   | Russia         | 822         | DQ479280              |
| 17 | <i>B. garinii</i>     | 1205              | <i>Ixodes ricinus</i>       | Luxembourg     | 670         | GU826980              |
| 18 | <i>B. garinii</i>     | KKU5              | N/A                         | Japan          | 669         | AB009862              |
| 19 | <i>B. garinii</i>     | IPT165            | <i>Ixodes ricinus</i>       | France         | 285         | FJ546618              |
| 20 | <i>B. japonica</i>    | Strain: H014      | <i>Ixodes ovatus</i>        | Japan          | 822         | Y10893                |
| 21 | <i>B. japonica</i>    | IKA2              | <i>Ixodes ricinus</i>       | Belgium        | 822         | Y10892                |
| 22 | <i>B. turdi</i>       | Ya501             | <i>Ixodes turdus</i>        | Japan          | 953         | AB016975              |
| 23 | <i>B. valaisiana</i>  | M49               | <i>Ixodes ricinus</i>       | Netherlands    | 825         | AF095945              |

---

|                      |       |                           |       |     |          |
|----------------------|-------|---------------------------|-------|-----|----------|
| <i>B. valaisiana</i> | VS116 | <i>Ixodes nipponensis</i> | Korea | 945 | AB016979 |
|----------------------|-------|---------------------------|-------|-----|----------|

---
